# Supplementary material for: Vibrational Spectroscopies and Chemometry for Nondestructive Identification and Differentiation of Painting Binders
Source: Hindawi journal article supplement (doi:10.1155/2017/3475659), 2017-01-01
Supplement: f1 [file 3475659.f1.pdf]

## Supplementary Materials

**Table S1** Major peaks in the FT-NIR spectra (frequency shifts in  $\text{cm}^{-1}$ ) of C, EW, FG, SG and RG along with corresponding assignments.

| EW   | C    | FG   | RG   | SG   | Band Assignment                                                                                                                 | Ref.   |
|------|------|------|------|------|---------------------------------------------------------------------------------------------------------------------------------|--------|
| 5900 | 5900 | 5915 | 5915 | 5915 | C-H aromatic/ $1^{\text{st}}$ overtone $\nu_a(\text{CH}_2)$                                                                     | [5, 9] |
| 5740 | 5732 | 5780 | 5780 | 5780 | $1^{\text{st}}$ overtone $\nu_s(\text{CH}_2)$                                                                                   | [5, 9] |
| 5160 | 5146 | 5140 | 5140 | 5140 | $\nu(\text{OH}) + \delta(\text{OH})$                                                                                            | [5, 9] |
| 4865 | 4860 | 4896 | 4896 | 4896 | $\nu_s(\text{NH}) + \delta(\text{NH})$ [ $\nu\text{N-H}$ symmetric and Amide II deformation (N-H in plane bending) combination] | [5, 9] |
| 4602 | 4612 | 4592 | 4592 | 4592 | $1^{\text{st}}$ overtone $\nu(\text{CO})$ amide I + amide III deformation (C-N stretching/N-H in plane bending)                 | [5, 9] |
| 4352 | 4340 | 4376 | 4376 | 4376 | $\nu_a(\text{CH}_2) + \delta(\text{CH}_2)$                                                                                      | [5, 9] |
| 4260 | 4265 | 4260 | 4260 | 4260 | $\nu_s(\text{CH}_2) + \delta(\text{CH}_2)$                                                                                      | [5, 9] |
| 4050 | 4050 | 4045 | 4045 | 4045 | CH combination ( $\text{CH}_2$ )/ $3^{\text{rd}}$ overtone $\delta(\text{CC})$                                                  | [5, 9] |
| 3984 | 3984 | 3988 | 3988 | 3988 | $1^{\text{st}}$ overtone $\nu(\text{C-N-C})$ amide                                                                              | [9]    |

**Table S2** Major peaks in the Raman spectra (frequency shifts in  $\text{cm}^{-1}$ ) of C, EW, FG, SG and RG along with corresponding assignments.

| EW   | C    | FG   | RG   | SG   | Band Assignment                               | Ref.   |
|------|------|------|------|------|-----------------------------------------------|--------|
| 1666 | 1658 | 1665 | 1666 | 1671 | Amide I                                       | [1, 4] |
| 1605 | 1616 | 1607 | 1603 | 1603 | Phe/Tyr                                       | [4]    |
| 1550 | 1550 |      |      |      | Trp                                           | [4]    |
| 1446 | 1450 | 1450 | 1452 | 1450 | C-H <sub>2</sub> scissoring                   | [1, 4] |
| 1414 | 1410 | 1406 | -    | -    | Aspartic and glutamic acids (C=O stretching)  | [4]    |
| 1341 | 1322 | 1318 | 1312 | 1322 | CH <sub>2</sub> deformation                   | [1, 4] |
| 1256 | 1246 | 1246 | 1245 | 1246 | Amide III                                     | [1, 4] |
| 1208 | 1212 | 1206 | 1209 | 1208 | Phe/Tyr                                       | [4]    |
| 1122 | 1120 | -    | -    | -    | C-CT stretching                               | [4]    |
| 1098 | 1090 | -    | -    | -    | $\nu(\text{CC})$ (aliphatic)/C-N stretching   | [1, 4] |
| 1034 | 1041 | 1030 | 1033 | 1033 | Phe                                           | [4]    |
| 1002 | 1002 | 1002 | 1002 | 1002 | Phe ring breathing                            | [1, 4] |
| -    |      | 975  | -    | -    | C-C vibration $\delta(\text{CH}_2)$           | [4]    |
| 954  | 955  | -    | -    | -    | C-C vibration, phosphate symmetric stretching | [4]    |
| 931  | 932  | 934  | 941  | 941  | C-C stretching                                | [1, 4] |
| -    | -    | 922  | 921  | 923  | C-C vibration $\delta(\text{CH}_3)$           | [4]    |
| -    | 880  |      |      |      | Trp                                           | [4]    |
| 847  | 852  | 856  | 860  | 861  | Tyr                                           | [4]    |
| 827  | 826  | -    | -    | -    | Tyr                                           | [4]    |
| -    | -    | 814  | 819  | 813  | C-C stretching                                | [4]    |

**Table S3** Major peaks in the FT-NIR spectra (frequency shifts in  $\text{cm}^{-1}$ ) of EY and WE along with corresponding assignments.

| WE   | EY   | Band Assignment                                                                                                 | Ref.   |
|------|------|-----------------------------------------------------------------------------------------------------------------|--------|
| 5808 | 5792 | 1 <sup>st</sup> overtone $\nu_a(\text{CH}_2)$                                                                   | [5, 9] |
| 5680 | 5680 | 1 <sup>st</sup> overtone $\nu_s(\text{CH}_2)$                                                                   | [5, 9] |
| 5160 | 5156 | $\nu(\text{OH})+\delta(\text{OH})$                                                                              | [5, 9] |
| 4854 | 4860 | $\nu(\text{NH})+\delta(\text{NH})^*$                                                                            | [5, 9] |
| 4606 | 4602 | 1 <sup>st</sup> overtone $\nu(\text{CO})$ amide I + amide III deformation (C-N stretching/N-H in plane bending) | [5, 9] |
| 4330 | 4330 | $\nu_a(\text{CH}_2)+\delta_a(\text{CH}_2)^*$                                                                    | [5, 9] |
| 4260 | 4260 | $\nu_s(\text{CH}_2)+\delta_s(\text{CH}_2)^*$                                                                    | [5, 9] |
| 4058 | 4063 | CH combination ( $\text{CH}_2$ )/ 3 <sup>rd</sup> overtone $\delta(\text{CC})$                                  | [5, 9] |

**Table S4** Major peaks in the Raman spectra (frequency shifts in  $\text{cm}^{-1}$ ) of EY and WE along with corresponding assignments.

| EY   | WE   | Band Assignment                                            | Ref.       |
|------|------|------------------------------------------------------------|------------|
| 1743 | 1740 | C=O stretching                                             | [4, 18]    |
| 1660 | 1660 | Amide I/ <i>cis</i> $\nu(\text{C}=\text{C})$               | [1, 4, 18] |
| 1526 | 1522 | Trp                                                        | [4]        |
| 1442 | 1435 | C-H <sub>2</sub> scissoring                                | [1, 4, 18] |
| 1300 | 1300 | In phase methylene twisting motion $\delta(\text{CH}_2)_2$ | [18]       |
| 1268 | 1264 | Amide III                                                  | [1, 4]     |
| 1192 | 1187 | Phe/Tyr                                                    | [4]        |
| 1156 | 1156 | C-CT stretching                                            | [4]        |
| 1081 | 1080 | C-C,C-N stretching                                         | [1, 4]     |
| 1028 | 1030 | Phe                                                        | [4]        |
| 1005 | 1003 | Phe ring breathing                                         | [1, 4]     |
| 884  | 892  | Trp                                                        | [4]        |
| 848  | 836  | Tyr                                                        | [4]        |

**Table S5** Major peaks in the FT-NIR spectra (frequency shifts in  $\text{cm}^{-1}$ ) of drying oils along with corresponding assignments.

| Drying oil | Assignment                                              | Ref.       |
|------------|---------------------------------------------------------|------------|
| 5790       | 1 <sup>st</sup> overtone $\nu_a(\text{CH}_2)$           | [5, 9]     |
| 5676       | 1 <sup>st</sup> overtone $\nu_s(\text{CH}_2)$           | [5, 9]     |
| 5260       | 2 <sup>nd</sup> overtone $\nu(\text{C}=\text{O})$       | [9]        |
| 5176       | 2 <sup>nd</sup> overtone $\nu(\text{C}=\text{O})$ ester | [5, 9]     |
| 4686       | $\nu(\text{CH}) + \nu(\text{C}=\text{O})$               | [5, 9, 19] |
| (4595)     | $[\nu_s(\text{CH}) + \nu(\text{C}=\text{C})]$           | [20]       |
| 4340       | $\nu_a(\text{CH}_2) + \delta(\text{CH}_2)$              | [5, 9]     |
| 4262       | $\nu_s(\text{CH}_2) + \delta(\text{CH}_2)$              | [5, 9]     |

**Table S6** Major peaks in the Raman spectra (frequency shifts in  $\text{cm}^{-1}$ ) of drying oils along with corresponding assignments.

| Drying oil | Assignment                                                                     | Ref.     |
|------------|--------------------------------------------------------------------------------|----------|
| 1746       | Stretching $\nu(\text{C}=\text{O})$ esters                                     | [22, 23] |
| 1655       | Stretching $\nu(\text{C}=\text{C})$ [ <i>cis</i> dialkyl C=C double bond]      | [18]     |
| 1445       | Bending $\delta(\text{CH}_2)$                                                  | [18]     |
| 1302       | In phase methylene twisting motion $\delta(\text{CH}_2)_2$                     | [18]     |
| 1267       | Rocking deformation of <i>cis</i> dialkyl ethylenes $\nu(\text{CH}=\text{CH})$ | [18]     |
| 1085       | Stretching $\nu(\text{C}-\text{C})$                                            | [21]     |
| 864        | Stretching $\nu(\text{C}-\text{C})$                                            | [21]     |

**Table S7** Major peaks in the FT-NIR spectra (frequency shifts in  $\text{cm}^{-1}$ ) of AG and TG along with corresponding assignments.

| AG   | TG            | Band Assignment                                                               | Ref. |
|------|---------------|-------------------------------------------------------------------------------|------|
| 5164 | 5181          | O-H stretching and HOH bending combination (O-H and HOH)                      | [9]  |
| 4761 | 4812          | O-H bending and C-O stretching combination. O-H/C-O polymeric (.O-H and .C-O) | [9]  |
| 4268 | 4454-<br>4228 | C-H stretching and $\text{CH}_2$ deformation combination                      | [9]  |
| 4000 | 4016          | C-H stretching and C-C (and C-O-C) stretching combination                     | [9]  |

**Table S8** Major peaks in the Raman spectra (frequency shifts in  $\text{cm}^{-1}$ ) of AG and TG along with corresponding assignments.

| AG   | TG   | Band Assignment                      | Ref.    |
|------|------|--------------------------------------|---------|
| 1460 | 1445 | $\delta(\text{CH}_2)$ scissoring     | [1, 24] |
| 1348 | 1349 | $\delta(\text{CH}_2)$ wagging        | [1, 24] |
| 1264 | 1250 | $\tau(\text{CH}_2)$                  | [1, 24] |
| 1078 | 1084 | $\nu(\text{COC})$ ether group (ring) | [1, 24] |
| 974  | -    | $\delta(\text{CH}_3)$                | [1, 24] |
| 950  | -    | CC symmetrical stretching            | [1, 24] |
| -    | 941  | $\nu(\text{COC})$                    | [1, 24] |
| 882  | 857  | $\nu(\text{COC})$                    | [1, 24] |
| 841  |      | $\nu(\text{COC})$                    | [1, 24] |
